# Supplementary material
Source: PubMed Central journal article supplement (PMC4458348)
Supplement: NIHMS690520-supplement-S1.pdf [file NIHMS690520-supplement-S1.pdf]

**Supplementary Table1:** Group Mean (SD) and Comparisons for each ERP Phenotype

| Phenotype     | SCZ           | BID           | Controls      | SCZ vs.<br>Controls | BID vs.<br>Controls | SCZ<br>vs.<br>BID |
|---------------|---------------|---------------|---------------|---------------------|---------------------|-------------------|
| P50 Ratio (%) | 73.93 (41.9)  | 66.06 (41.5)  | 39.35 (26.7)  | <b>P&lt;0.0001</b>  | <b>P&lt;0.0001</b>  | P=0.12            |
| P3 Amplitude  | 8.11 (4.6)    | 9.13 (5.1)    | 13.01 (5.4)   | <b>P&lt;0.0001</b>  | <b>P&lt;0.0001</b>  | P=0.54            |
| P3 Latency    | 416.56 (89.2) | 417.08 (82.7) | 371.35 (52.4) | <b>P=0.001</b>      | <b>P&lt;0.0001</b>  | P=0.67            |
| Gamma 40Hz*   | 0.136 (.14)   | 0.142 (.12)   | 0.234 (.14)   | <b>P&lt;0.0001</b>  | <b>P&lt;0.0001</b>  | P=0.76            |

Note: age, sex were included as covariates. \* SCZ n=103, BID n=110, HC n=116

**Supplementary Table 2.** Results for SNPs with  $p < 10^{-5}$  for the sensory gating (P50)

| CHR | SNP               | P        | CHR | SNP                 | P        |
|-----|-------------------|----------|-----|---------------------|----------|
| 1   | rs116590260       | 3.88E-06 | 3   | rs2944438           | 5.36E-06 |
| 1   | rs2666498         | 6.24E-06 | 3   | rs2934127           | 1.68E-06 |
| 1   | rs10889306        | 5.60E-06 | 3   | rs16860909          | 5.75E-06 |
| 1   | rs11207939        | 6.78E-06 | 3   | chr3_148511660_I**  | 8.23E-06 |
| 1   | rs2666470         | 2.36E-06 | 3   | rs116586451         | 5.49E-06 |
| 1   | rs2941679         | 7.52E-06 | 4   | MERGED_DEL_2_25917* | 1.45E-06 |
| 1   | rs71628699        | 5.67E-06 | 6   | rs6933791           | 8.93E-06 |
| 1   | rs74404550        | 5.43E-06 | 6   | rs79082752          | 2.82E-06 |
| 1   | rs35588936        | 4.84E-06 | 6   | rs2480006           | 2.23E-06 |
| 1   | rs71628702        | 5.28E-06 | 6   | rs4712725           | 4.74E-06 |
| 1   | rs112630935       | 2.58E-06 | 6   | rs7755443           | 3.85E-06 |
| 1   | rs111342069       | 3.16E-06 | 6   | rs2149465           | 4.90E-06 |
| 1   | chr1_155973646_D* | 2.65E-06 | 6   | rs4712726           | 4.20E-06 |
| 1   | rs12730388        | 1.92E-06 | 6   | rs2498282           | 2.12E-06 |
| 1   | rs17385169        | 2.63E-06 | 6   | rs1928079           | 1.60E-06 |
| 1   | rs35200356        | 2.70E-06 | 6   | rs12664157          | 8.07E-06 |
| 1   | rs7513082         | 8.77E-07 | 6   | rs16887031          | 6.29E-06 |
| 1   | rs71630611        | 8.19E-07 | 6   | rs140136635         | 5.72E-06 |
| 1   | rs7555839         | 2.97E-06 | 6   | rs111452919         | 6.86E-06 |

Mei-Hua Hall: Table

|   |             |          |    |                    |          |
|---|-------------|----------|----|--------------------|----------|
| 1 | rs12735992  | 3.01E-06 | 6  | rs11756772         | 6.61E-06 |
| 1 | rs34224286  | 1.02E-06 | 6  | rs112957989        | 6.61E-06 |
| 1 | rs78510691  | 5.82E-06 | 6  | rs115919213        | 6.69E-06 |
| 2 | rs11689918  | 4.71E-06 | 6  | rs76299936         | 6.60E-06 |
| 2 | rs2058586   | 1.99E-06 | 6  | rs35860242         | 6.37E-06 |
| 2 | rs55943122  | 9.97E-06 | 7  | rs62463878         | 5.94E-06 |
| 2 | rs12469840  | 8.45E-06 | 7  | rs112690815        | 5.95E-06 |
| 2 | rs2900638   | 4.76E-06 | 8  | rs73682378         | 2.65E-06 |
| 2 | rs11898557  | 2.90E-06 | 8  | rs12155545         | 4.40E-06 |
| 2 | rs62147772  | 6.70E-06 | 9  | chr9_31280309_D*   | 1.25E-06 |
| 2 | rs74890112  | 1.41E-06 | 10 | rs55931617         | 4.07E-07 |
| 2 | rs112623157 | 1.95E-06 | 10 | rs56329139         | 3.95E-07 |
| 2 | rs72905561  | 1.49E-06 | 10 | rs112156819        | 6.27E-06 |
| 2 | rs112441872 | 2.05E-06 | 10 | rs112440822        | 5.12E-06 |
| 2 | rs72905565  | 1.04E-06 | 10 | rs78160272         | 5.10E-06 |
| 2 | rs72905566  | 1.06E-06 | 11 | rs2500035          | 3.10E-06 |
| 2 | rs147696438 | 6.94E-07 | 11 | rs2403276          | 2.69E-06 |
| 2 | rs6542045   | 8.71E-06 | 11 | chr11_28743447_I** | 8.25E-06 |
| 2 | rs11691794  | 8.64E-06 | 11 | rs7925780          | 9.72E-07 |
| 2 | rs11688418  | 8.62E-06 | 11 | rs4756259          | 3.31E-07 |
| 2 | rs6706874   | 8.62E-06 | 11 | rs61888369         | 4.91E-06 |

Mei-Hua Hall: Table

|   |                    |          |    |                     |          |
|---|--------------------|----------|----|---------------------|----------|
| 2 | rs10169159         | 8.62E-06 | 11 | rs12273072          | 4.59E-06 |
| 2 | rs12711738         | 8.63E-06 | 11 | rs17366101          | 2.33E-06 |
| 2 | rs34623958         | 8.62E-06 | 12 | rs147103399         | 7.33E-06 |
| 2 | rs114192794        | 8.34E-06 | 13 | rs80180965          | 4.36E-06 |
| 2 | rs7557281          | 6.97E-06 | 13 | rs61950407          | 6.46E-06 |
| 2 | chr2_113037697_I** | 9.37E-06 | 13 | rs188147411         | 1.24E-06 |
| 2 | chr2_113038560_D*  | 8.08E-06 | 13 | rs77041142          | 2.54E-06 |
| 2 | rs6542050          | 8.29E-06 | 13 | rs80040124          | 1.16E-06 |
| 2 | rs6745942          | 8.28E-06 | 13 | rs61969524          | 3.84E-06 |
| 2 | rs10177573         | 8.29E-06 | 14 | rs17201643          | 3.34E-06 |
| 2 | rs12464478         | 2.30E-06 | 14 | chr14_85625767_D*   | 7.92E-06 |
| 2 | rs114991511        | 8.40E-06 | 14 | rs2401977           | 2.61E-06 |
| 2 | rs62174278         | 8.75E-06 | 14 | rs4243689           | 7.84E-06 |
| 2 | rs62171069         | 8.88E-06 | 14 | rs7146008           | 2.59E-06 |
| 2 | rs75672243         | 8.85E-06 | 14 | rs12433069          | 2.76E-06 |
| 2 | rs183405899        | 8.34E-06 | 15 | rs75848984          | 6.01E-06 |
| 2 | chr2_211980378_D*  | 9.99E-06 | 15 | rs77879759          | 2.11E-06 |
| 2 | rs151206640        | 2.94E-07 | 15 | chr15_101799904_I** | 9.91E-06 |
| 3 | rs9756214          | 8.43E-06 | 17 | rs3760338           | 8.23E-06 |
| 3 | rs1565587          | 1.15E-06 | 17 | rs72883103          | 6.99E-06 |
| 3 | rs2933266          | 1.08E-06 | 18 | rs9966346           | 4.82E-06 |

Mei-Hua Hall: Table

|   |             |          |    |             |          |
|---|-------------|----------|----|-------------|----------|
| 3 | rs2934084   | 1.33E-06 | 19 | rs45580639  | 5.65E-07 |
| 3 | rs1994735   | 1.33E-06 | 19 | rs116878764 | 3.51E-06 |
| 3 | rs146864704 | 5.19E-07 |    |             |          |

Note: \*chr\_D is a deletion variant; \*\*chr\_I is an insertion variant

**Supplementary Table 3.** Results for SNPs with  $p < 10^{-5}$  for the ASSR gamma

| CHR | SNP               | P        | CHR | SNP                | P        |
|-----|-------------------|----------|-----|--------------------|----------|
| 1   | rs41302778        | 8.89E-06 | 9   | rs11793578         | 8.12E-06 |
| 1   | rs74654056        | 8.28E-06 | 10  | rs4319415          | 9.98E-06 |
| 1   | rs72771915        | 6.67E-06 | 10  | chr10_5652532_D*   | 8.11E-06 |
| 1   | rs72771923        | 6.02E-06 | 10  | rs3981241          | 6.81E-06 |
| 2   | rs74926429        | 4.88E-06 | 10  | rs17153575         | 1.70E-06 |
| 2   | chr2_84531338_D*  | 8.24E-06 | 10  | rs192455786        | 1.67E-06 |
| 2   | rs150465452       | 1.34E-06 | 12  | rs3782302          | 4.25E-06 |
| 2   | rs150657852       | 2.59E-06 | 12  | chr12_26804298_D*  | 2.57E-06 |
| 3   | rs143277250       | 3.01E-06 | 12  | rs4963668          | 4.27E-06 |
| 3   | rs56031267        | 5.23E-06 | 12  | rs1449567          | 4.69E-07 |
| 3   | rs59886856        | 6.60E-06 | 12  | rs4964013          | 1.89E-06 |
| 3   | rs7642325         | 5.14E-06 | 12  | rs1994134          | 4.27E-06 |
| 3   | rs7642328         | 5.14E-06 | 12  | rs10743589         | 4.27E-06 |
| 3   | rs9814884         | 5.05E-06 | 12  | rs1375656          | 4.27E-06 |
| 3   | rs9818662         | 5.04E-06 | 12  | rs2167068          | 4.28E-06 |
| 3   | rs9818675         | 4.95E-06 | 12  | chr12_26817273_I** | 8.92E-07 |
| 3   | rs114766768       | 6.64E-06 | 12  | rs2035439          | 4.68E-07 |
| 3   | chr3_159430635_D* | 5.64E-07 | 12  | rs2062165          | 4.68E-07 |
| 4   | rs62409317        | 2.60E-06 | 12  | rs4500564          | 9.82E-07 |

## Mei-Hua Hall: Table

|   |                  |          |    |                   |          |
|---|------------------|----------|----|-------------------|----------|
| 4 | rs62409318       | 3.81E-06 | 12 | rs7137901         | 4.27E-06 |
| 4 | rs193065646      | 7.20E-06 | 12 | rs1900942         | 4.26E-06 |
| 4 | rs115983306      | 7.21E-06 | 12 | rs10743591        | 4.68E-07 |
| 4 | rs181531738      | 9.77E-08 | 12 | rs1982385         | 2.12E-06 |
| 4 | rs146360492      | 9.05E-08 | 12 | rs7976479         | 2.02E-06 |
| 4 | rs114213960      | 8.47E-08 | 12 | rs187194665       | 8.64E-06 |
| 4 | rs114676069      | 8.32E-07 | 12 | rs185093666       | 1.19E-06 |
| 4 | chr4_54122201_D* | 5.60E-08 | 14 | rs77380152        | 9.71E-06 |
| 4 | rs183516975      | 5.95E-06 | 14 | rs17099126        | 1.89E-06 |
| 4 | rs9999174        | 3.96E-06 | 14 | rs56187017        | 1.10E-06 |
| 4 | rs72713720       | 4.20E-06 | 17 | rs10445235        | 4.58E-06 |
| 4 | rs12639918       | 1.21E-06 | 17 | rs9913752         | 6.91E-06 |
| 4 | rs28704581       | 4.37E-06 | 17 | rs9912615         | 6.41E-06 |
| 4 | rs9790585        | 5.50E-06 | 17 | rs9904599         | 7.09E-06 |
| 4 | rs4862775        | 8.61E-07 | 17 | chr17_72272282_D* | 5.26E-06 |
| 6 | rs28442121       | 2.15E-06 | 17 | rs9912714         | 6.01E-06 |
| 7 | rs10271851       | 4.28E-06 | 17 | rs9900615         | 1.78E-06 |
| 8 | rs7813840        | 4.66E-06 | 17 | rs9893381         | 5.57E-06 |
| 8 | rs76043038       | 3.26E-06 | 17 | rs56066632        | 6.15E-06 |
| 8 | rs34693631       | 9.42E-06 | 19 | rs8104171         | 1.39E-06 |
| 8 | rs139947285      | 1.57E-06 | 19 | rs17696172        | 9.13E-06 |

Mei-Hua Hall: Table

|   |                  |          |    |                   |          |
|---|------------------|----------|----|-------------------|----------|
| 9 | chr9_16858725_D* | 3.53E-06 | 19 | chr19_52606745_D* | 7.79E-06 |
| 9 | chr9_89672289_D* | 8.39E-06 | 20 | rs7272112         | 9.45E-06 |
| 9 | rs117557066      | 9.25E-06 | 20 | rs113525166       | 1.06E-06 |
|   |                  |          | 21 | rs17275316        | 1.26E-06 |

Note: \*chr\_D is a deletion variant; \*\*chr\_I is an insertion variant



**Supplementary Table 4.** Results for SNPs with  $p < 10^{-5}$  for the P3 amplitude

| CHR | SNP              | P        | CHR | SNP         | P        |
|-----|------------------|----------|-----|-------------|----------|
| 1   | chr1_58687881_D* | 1.18E-06 | 10  | rs149429405 | 6.01E-06 |
| 1   | rs72667957       | 1.17E-06 | 10  | rs2368204   | 8.60E-06 |
| 1   | rs72667959       | 1.30E-06 | 12  | rs497740    | 7.34E-06 |
| 1   | rs72667963       | 4.54E-06 | 12  | rs76354355  | 3.27E-06 |
| 1   | rs72667964       | 2.17E-06 | 13  | rs7321523   | 3.07E-06 |
| 1   | rs56392128       | 2.01E-06 | 13  | rs9598262   | 6.75E-06 |
| 1   | rs55889715       | 1.07E-06 | 13  | rs11618754  | 5.85E-06 |
| 1   | rs114185709      | 1.12E-06 | 13  | rs959442    | 6.94E-06 |
| 1   | rs10493246       | 1.40E-06 | 13  | rs9563914   | 7.50E-06 |
| 1   | rs72667981       | 1.44E-06 | 14  | rs41349946  | 4.36E-06 |
| 1   | rs72667986       | 1.44E-06 | 14  | rs7140607   | 7.57E-06 |
| 1   | rs61823152       | 9.08E-06 | 15  | rs72625758  | 9.57E-06 |
| 1   | rs75685316       | 1.12E-06 | 16  | rs7186708   | 7.94E-06 |
| 2   | rs144682132      | 4.02E-06 | 17  | rs4795917   | 6.25E-06 |
| 2   | rs6734019        | 8.44E-06 | 18  | rs181594891 | 9.05E-06 |
| 3   | rs116175449      | 7.39E-06 | 18  | rs184033365 | 5.57E-06 |
| 3   | rs4417834        | 8.01E-06 | 18  | rs150269099 | 8.23E-06 |
| 3   | rs13084762       | 9.75E-06 | 18  | rs72894540  | 3.61E-06 |
| 4   | rs17597248       | 5.73E-06 | 18  | rs72896572  | 2.09E-07 |

Mei-Hua Hall: Table

|   |             |          |    |                    |          |
|---|-------------|----------|----|--------------------|----------|
| 6 | rs34375936  | 9.43E-06 | 18 | rs150280039        | 9.18E-06 |
| 6 | rs13205715  | 5.90E-06 | 18 | chr18_71776149_I** | 8.64E-06 |
| 7 | rs147909402 | 7.82E-07 | 19 | rs56357228         | 2.40E-06 |
| 7 | rs146938454 | 8.62E-07 | 19 | chr19_2540372_D*   | 2.27E-06 |
| 7 | rs149286257 | 3.65E-06 | 19 | rs12977761         | 2.52E-06 |
| 7 | rs79432086  | 4.45E-06 | 19 | rs67768503         | 1.36E-06 |
| 7 | rs116874802 | 4.55E-06 | 19 | rs35511982         | 1.39E-06 |
| 8 | rs138606037 | 3.77E-07 | 19 | rs66701648         | 7.41E-07 |
| 9 | rs341487    | 4.90E-06 | 19 | rs6510682          | 7.67E-07 |
| 9 | rs341485    | 4.59E-06 | 19 | rs11879339         | 1.36E-06 |
| 9 | rs116933968 | 7.20E-06 | 20 | rs202384           | 6.29E-06 |
| 9 | rs111375237 | 1.33E-06 |    |                    |          |

Note: \*chr\_D is a deletion variant; \*\*chr\_I is an insertion variant

**Supplementary Table 5.** Results for SNPs with  $p < 10^{-5}$  for the P3 latency

| CHR | SNP                | P        | CHR | SNP                | P        |
|-----|--------------------|----------|-----|--------------------|----------|
| 1   | rs1223869          | 7.20E-06 | 8   | rs1982229          | 8.10E-06 |
| 2   | rs11678424         | 5.61E-07 | 10  | rs2395024          | 4.14E-06 |
| 2   | chr2_134206222_I** | 1.73E-06 | 10  | rs1463060          | 3.50E-06 |
| 3   | rs2979982          | 9.20E-06 | 10  | rs1947740          | 4.79E-06 |
| 3   | rs2947652          | 7.35E-06 | 10  | rs1947739          | 3.44E-06 |
| 3   | rs6795578          | 6.88E-06 | 10  | rs1463059          | 3.68E-06 |
| 3   | rs4679199          | 5.42E-06 | 10  | rs2616059          | 4.56E-06 |
| 3   | rs11921312         | 6.54E-06 | 10  | rs2616058          | 4.84E-06 |
| 3   | rs9840826          | 7.43E-06 | 10  | chr10_87991758_I** | 9.48E-06 |
| 3   | rs11711638         | 9.11E-06 | 10  | rs2275227          | 4.53E-06 |
| 3   | rs7633797          | 7.15E-06 | 10  | rs11187569         | 3.64E-06 |
| 3   | rs12637341         | 7.01E-06 | 15  | rs1991214          | 9.62E-06 |
| 5   | rs10472616         | 1.33E-06 | 15  | rs2911854          | 4.00E-06 |
| 5   | rs13360455         | 4.44E-06 | 15  | rs2911853          | 3.97E-06 |
| 6   | rs9504558          | 3.88E-06 | 15  | rs2911851          | 4.17E-06 |
| 6   | rs1323200          | 1.84E-06 | 15  | rs63179863         | 6.56E-06 |
| 6   | rs6914546          | 3.86E-06 | 15  | rs2911849          | 4.72E-06 |
| 7   | rs34277457         | 9.99E-08 | 15  | rs10851487         | 9.62E-06 |
| 7   | rs7778071          | 3.21E-07 | 15  | rs1035705          | 9.27E-06 |

Mei-Hua Hall: Table

Note: \*\*chr\_I is an insertion variant

**Supplementary Figure 1.** The variance explained of different phenotypes in cases by polygenic schizophrenia score (PRS-SCZ, left), bipolar score (PRS-BIP, middle), and major depressive disorder (PRS-MDD, right) for different pcutoff SNP sets

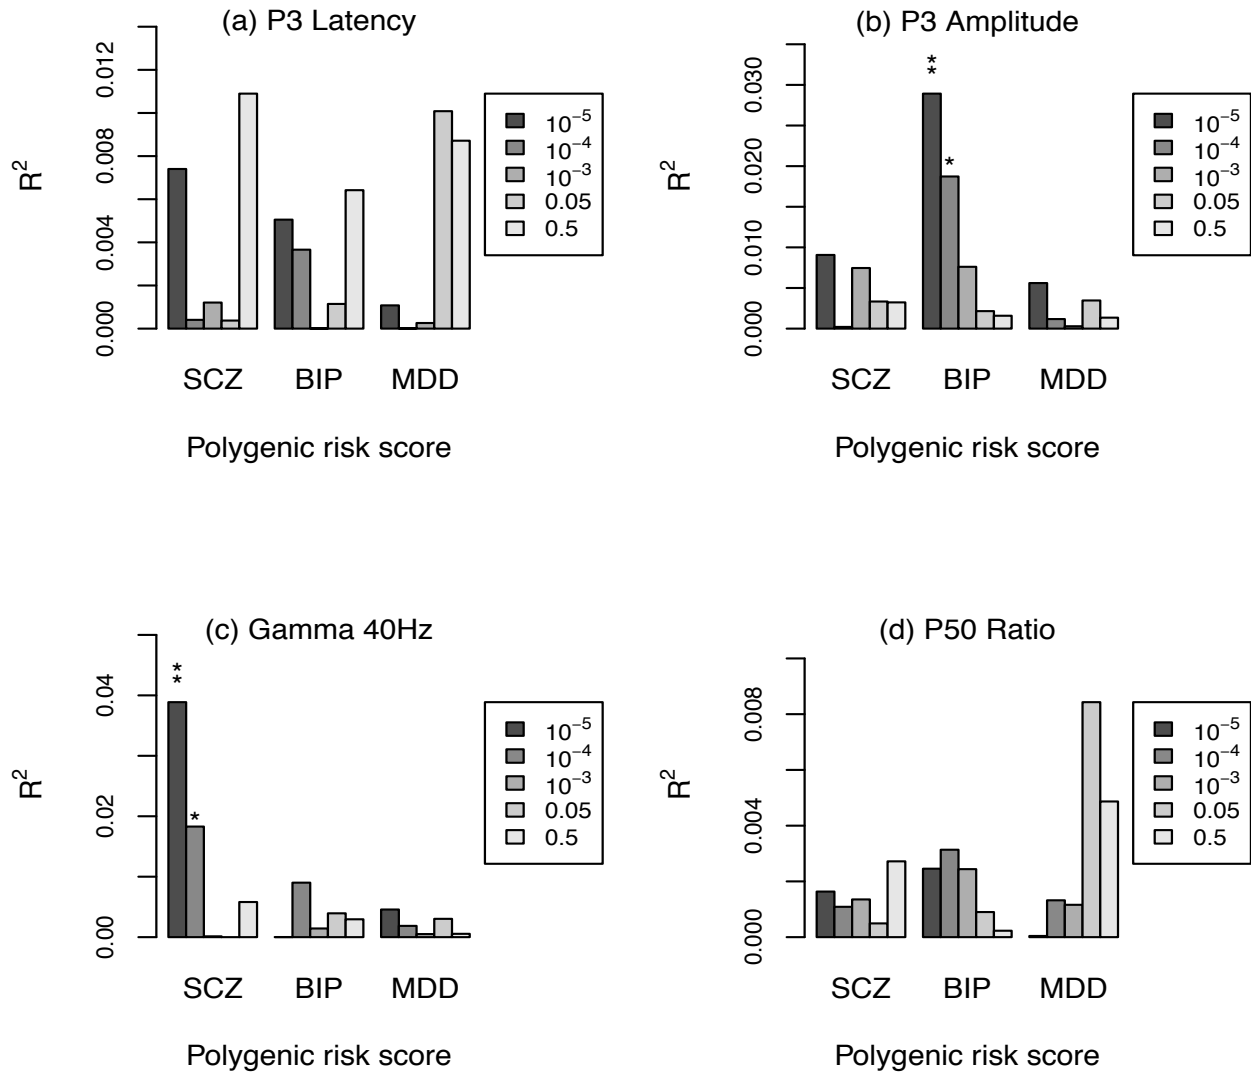

NOTE: \* $P < 0.05$ ; \*\* $P \leq 0.005$ . PRS-scz was associated with ASSR gamma in cases at  $P_T$   $1e-4$  and  $P_T$   $1e-5$ ; the latter remained significant after multiple testing correction. PRS-BIP was associated with P3 amplitude in cases at  $P_T$   $1e-4$  and  $P_T$   $1e-5$ , the latter again survived

## Mei-Hua Hall: Supplementary Figure

multiple testing correction. Among cases, higher genetic risk scores were associated with smaller evoked gamma and reduced P3 amplitudes.

**Supplementary Figure 2.** The variance explained of different phenotypes in controls by polygenic schizophrenia score (PRS-SCZ, left), bipolar score (PRS-BIP, middle), and major depressive disorder (PRS-MDD, right) for different pcutoff SNP sets

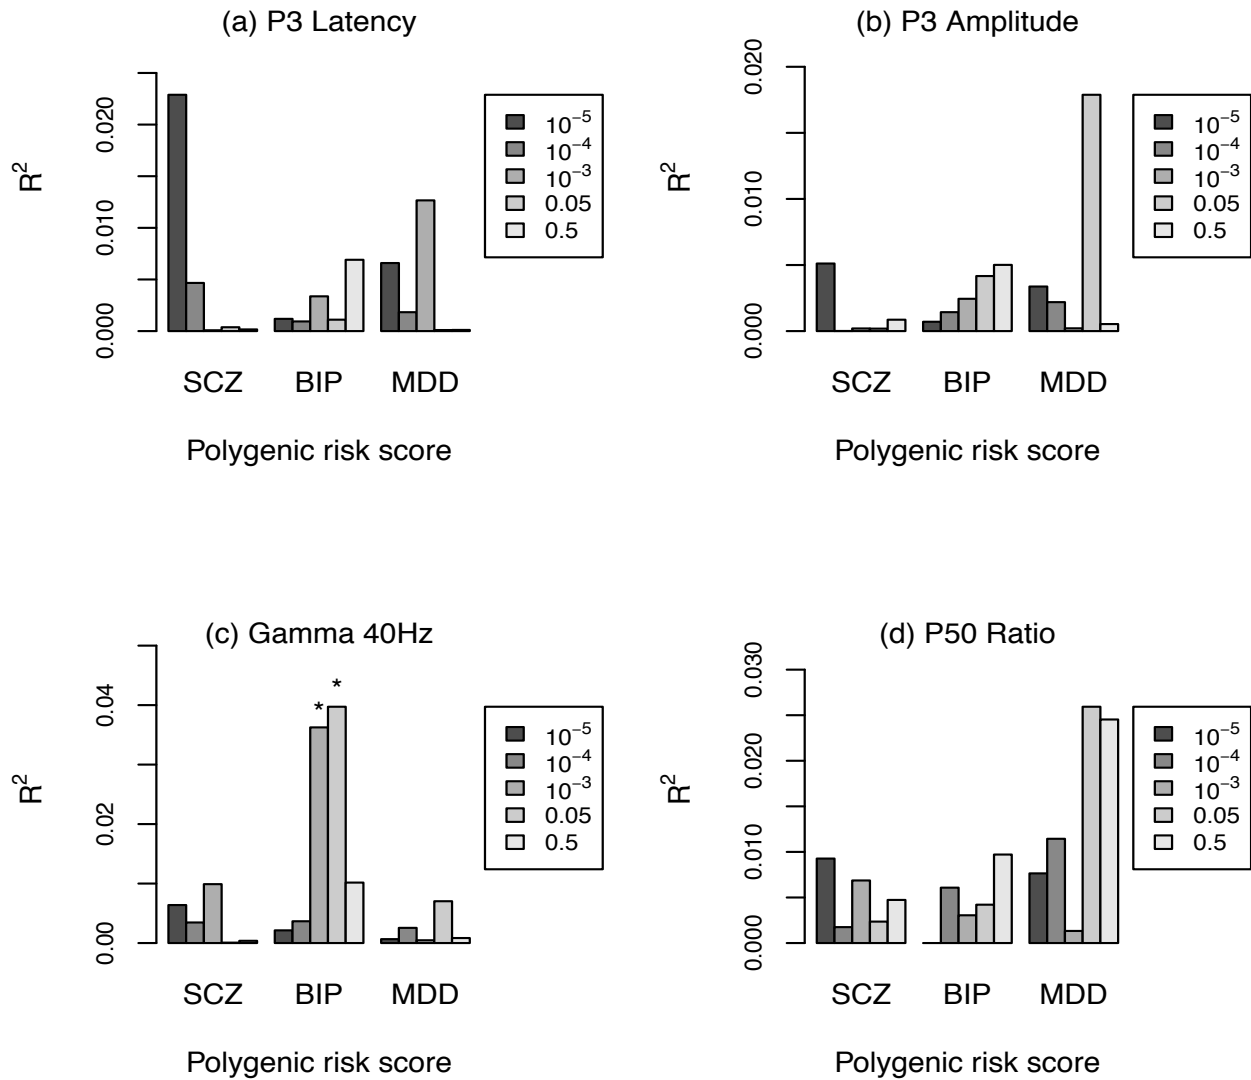

NOTE: \* $P < 0.05$
